# Supplementary material for: Dual-Ring SNAREpin Machinery Tuning for Fast Synaptic Vesicle Fusion
Source: MDPI journal article supplement (doi:10.3390/biom14050600), 2024-05-19
Supplement: s1 [file s1]

# Dual-Ring SNAREpin Machinery Tuning for Fast Synaptic Vesicle Fusion

## Supplementary Material

Matthieu Caruel

Frédéric Pincet

### Content

This supplementary material provides the source code that generates an interactive Python **shiny** app. This app to interactively observe the the effects of the model parameters  $N_c$ ,  $N_p$  and  $h$  on the energy landscapes of the system and its barriers.

For more information about **shiny** apps we refer to [the shinylive website](#).

The downloaded **.zip** file contains the following:

- **css** directory: contains a minimal **.css** stylesheet
- **app.py**: the code of the shiny app
- **barriers\_data.csv**: the dataset of the energy barriers for the considered ranges of parameters values
- **manifest.json**: metadata of the application
- **requirements.txt**: to set the Python environment in which the app was developed

### Execution procedure

This app was developed using Python v3.11.5.

1. [Install shiny](#)
2. Open a terminal in the directory where **app.py** is located
3. Execute the command: **shiny run --reload app.py**
4. The command will provide a local URL like **http://127.0.0.1:8000** that can be pasted in a web browser to use the app locally
